# Supplementary material for: Physiological responses to ultra-high CO 2 levels in an evergreen tree species
Source: Copernicus journal article supplement (doi:10.5194/egusphere-2025-807), 2025-03-04
Supplement: Supplementary file 1 [file egusphere-2025-807-supplement.pdf]

# Physiological responses to ultra-high CO<sub>2</sub> levels in an evergreen tree species

Ben-El Levy<sup>1</sup>, Yedidya Ben-Eliyahu<sup>1</sup>, Yaniv-Brian Grunstein<sup>1</sup>, Itay Halevy<sup>2</sup>, Tamir Klein<sup>1</sup>

<sup>1</sup> Department of Plant and Environmental Sciences, Weizmann Institute of Science

<sup>2</sup> Department of Earth and Planetary Sciences, Weizmann Institute of Science

## Supplementary Information

### Supplementary Figures

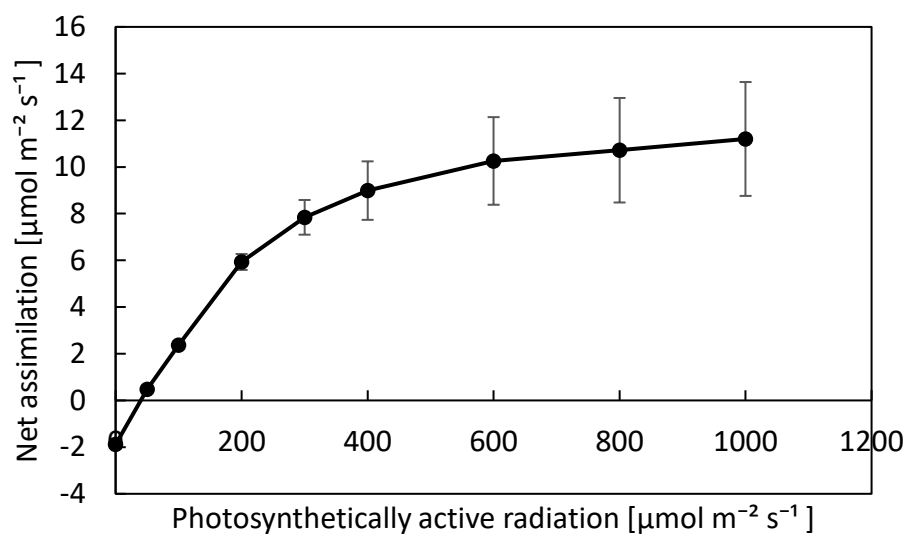

**Fig. S1. Light response curve of *Psidium cattleianum*.** Plants were exposed to increasing light levels and their net assimilation rate was measured. Error bars represent standard errors ( $n = 6$ ).

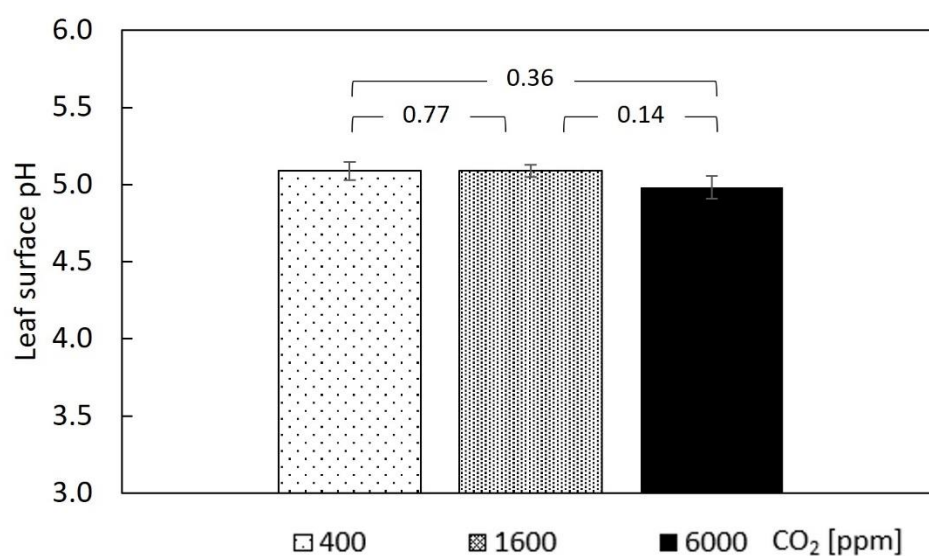

14  
 15 **Fig. S2 Leaf surface pH is similar under different CO<sub>2</sub> concentrations.** Data points are  
 16 means of 10 guava saplings subjected to different CO<sub>2</sub> concentrations. Error bars represent  
 17 standard errors. P-values are from paired t-tests.
